# Supplementary material for: The Impact of Short-Term Video Games on Performance among Children with Developmental Delays: A Randomized Controlled Trial
Source: PubMed Central journal article supplement (PMC4794225; doi:10.1371/journal.pone.0149714), 2016-03-16
Supplement: pone.0149714.s003.pdf [file pone.0149714.s003.pdf]

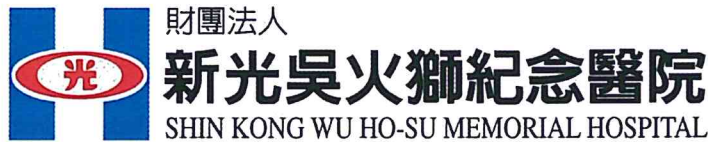

## 醫學倫理暨人體試驗審查委員會

### 同意臨床試驗證明書

試驗計畫名稱：健康復健互動軟體對發展遲緩兒童復健加成療效研究

計畫書版本/日期：第一版/971027

計畫書編號/本會審查編號：97E-037

試驗總主持人：謝如蘭醫師

受試者同意書版本/日期：第一版/971027

主持人手冊/日期：NA

過會期：980115

試驗有效期限：2009年1月至2009年12月

## Ethics Committee/Institutional Review Board

### Approval of Clinical Trial

Protocol Title : The Additional Therapeutic Effects of Virtual Reality System in Children with Developmental Delays

Protocol Version/Date : Version 1/27 October 2008

IRB Reference Number : 97E-037

Chief Principal Investigator : Ru-Lan Hsieh

Informed Consent Form/Date : Version 1/27 October 2008

Investigator's Brochure/Date : NA

Board Meeting/Approval Dated : No.1/15-Jan-2009

Study Approval Expires : December 2009

**The above study is approved by the Institutional Review Board on 1/15/2009.**

在有效期屆滿之前，研究計畫主持人應向本委員會報告研究計畫的進行狀況。若屆時尚未完成，應重新申請。該計畫任何部分若欲更改，需向本委員會重新提出申請。計畫主持人對受試者任何保具有危險而且未能預期之問題，例如：對藥物、放射性元素或對醫療器材產生嚴重或非預期不良反應等，需立即向本委員會提出書面報告。

本院醫學倫理暨人體試驗委員會之組織與執行皆符合 ICH-GCP  
The Ethics Committee/Institutional Review Board of Shin Kong Wu  
Ho-Su Memorial Hospital performs its functions according to written  
operating procedures and complies with GCP and with the applicable  
regulatory requirements.

審查案號 97E-037B

Yours Sincerely,  
Gong-Jhe Wu, M.D., Ph.D.  
Chairman  
EC/IRB, SKMH  
Shin Kong Wu  
Ho-Su Memorial Hospital  
Taiwan R.O.C.
